# Supplementary material for: Modification of Mesoporous Silica Surface by Immobilization of Functional Groups for Controlled Drug Release
Source: Hindawi journal article supplement (doi:10.1155/2020/9176257), 2020-07-13
Supplement: f1 [file 9176257.f1.docx]

# Journal of Chemistry

Modification of Mesoporous Silica Surface by Immobilization of Functional Groups for Controlled Drug Release

ABDULLAH M ALSWIELEH

Chemistry Department, College of Science, King Saud University, PO Box 2455, Riyadh 11451, Saudi Arabia

Correspondence should be addressed to Abdullah M Alswieleh [aswieleh@ksu.edu.sa](mailto:aswieleh@ksu.edu.sa)


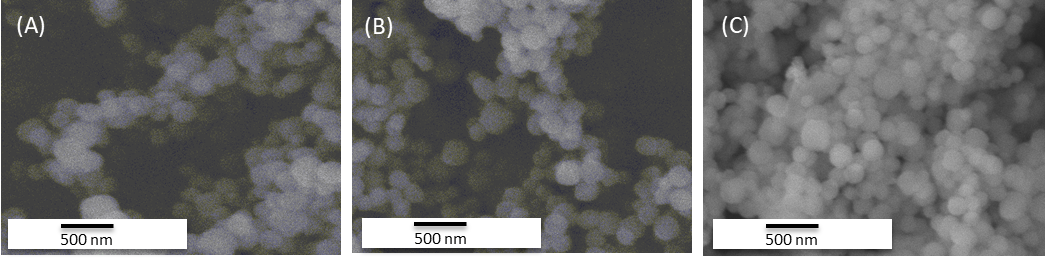


Figure 1S. SEM images of (A) TAMPAC-MSNs-NH2, (B) TAMPAC-MSNs-SH, and (C) TAMPAC-MSNs-SO3-.


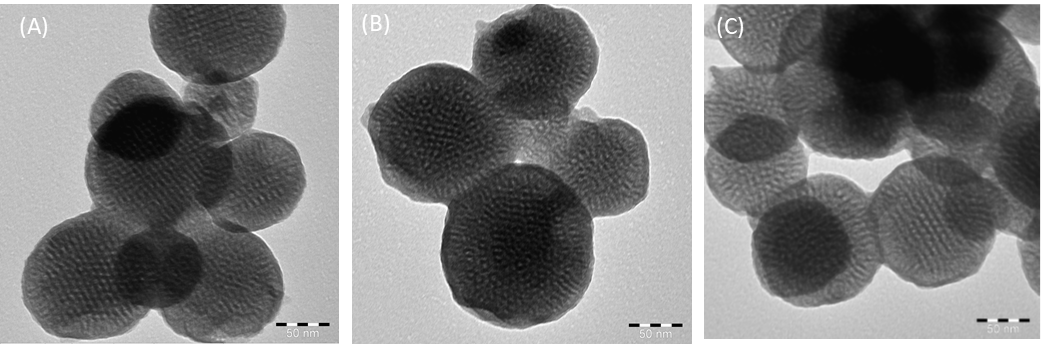


Figure 2S. TEM images of (A) TAMPAC-MSNs-NH2, (B) TAMPAC-MSNs-SH, and (C) TAMPAC-MSNs-SO3-.


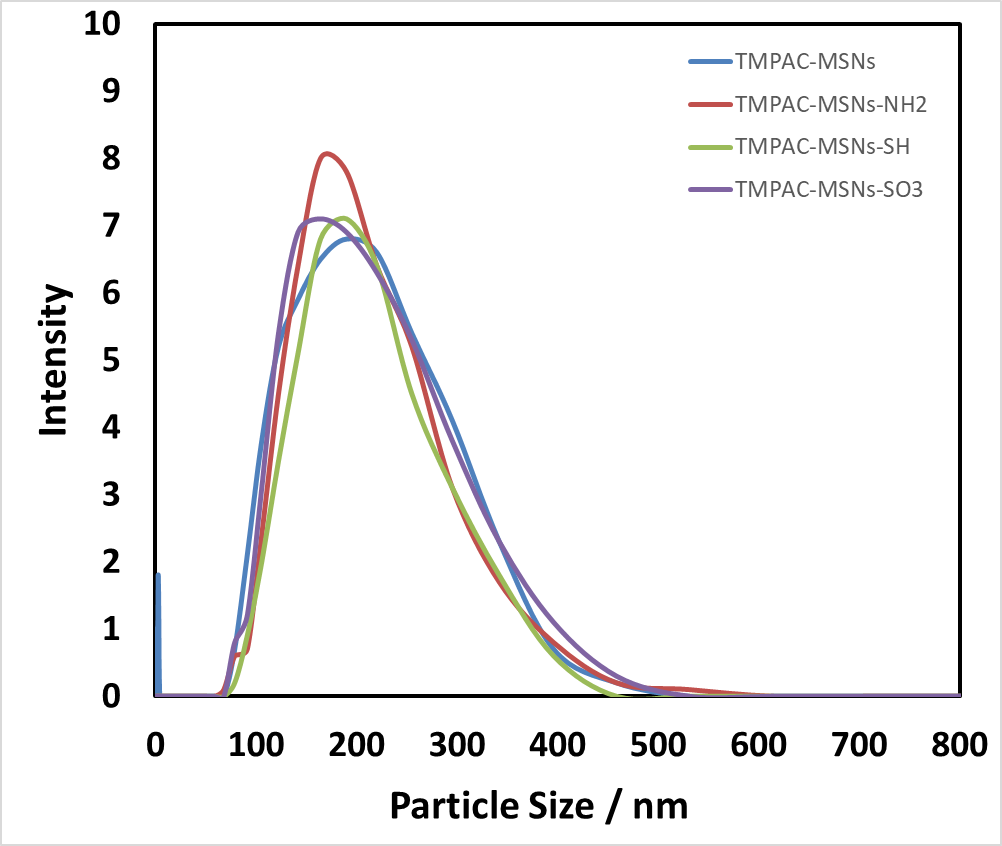


Figure 3S. Size distribution of fabricated MSNs in PBS at pH 7.4.

Figure 4S. Surface zeta potential of unloaded and Doxy-loaded MSNs in PBS at pH 7.4.
